# Supplementary material for: Evidence for a Role of Proline and Hypothalamic Astrocytes in the Regulation of Glucose Metabolism in Rats
Source: PubMed Central journal article supplement — Diabetes. 2013 Mar 14;62(4):1152–8. doi: 10.2337/db12-0228 (PMC3609585; doi:10.2337/db12-0228), 2013-03-14

SUPPLEMENTARY DATA

**Supplementary Table 1.** Characteristics of the experimental groups before and during the pancreatic clamp studies during acute infusions of either vehicle or proline into the MBH.

|                                                                                                    | <b>Vehicle</b> | <b>Proline</b> |
|----------------------------------------------------------------------------------------------------|----------------|----------------|
| <b>Basal</b>                                                                                       |                |                |
| Body weight (g)                                                                                    | 308±2          | 319±2          |
| Insulin (ng/ml)                                                                                    | 1.9±0.3        | 0.9±0.1*       |
| Glucagon (pg/ml)                                                                                   | 83±10          | 85±6           |
| <b>Clamp</b>                                                                                       |                |                |
| Glucose (mM)                                                                                       | 8.3±0.4        | 7.8±0.5        |
| Insulin (ng/ml)                                                                                    | 1.2±0.1        | 1.2±0.3        |
| Glucagon (pg/ml)                                                                                   | 33±7           | 39±7           |
| Adiponectin (ng/ml)                                                                                | 3.7±0.3        | 3.7±0.2        |
| MBH, mediobasal hypothalamus. Data are means±s.e.m.; n=4-6. Asterisk denote p<0.05 versus vehicle. |                |                |

**Supplementary Table 2.** Metabolic characteristics of the experimental groups before and during the pancreatic clamp studies in animals receiving systemic infusions of either vehicle or proline plus central (MBH) vehicle or LDH inhibitor.

|                                                                                                                                          | <b>Veh/Veh<sup>a</sup></b> | <b>Veh/Proline</b> | <b>LDHi/Proline</b> |
|------------------------------------------------------------------------------------------------------------------------------------------|----------------------------|--------------------|---------------------|
| <b>Basal</b>                                                                                                                             |                            |                    |                     |
| Body weight (g)                                                                                                                          | 330±10                     | 328±9              | 330±8               |
| Insulin (ng/ml)                                                                                                                          | 1.3±0.2                    | 0.9±0.2*           | 1.3±0.2             |
| Glucagon (pg/ml)                                                                                                                         | 89±15                      | 93±6               | 85±10               |
| <b>Clamp</b>                                                                                                                             |                            |                    |                     |
| Glucose (mM)                                                                                                                             | 8.4±0.1                    | 8.2±0.1            | 8.3±0.2             |
| Insulin (ng/ml)                                                                                                                          | 1.0±0.1                    | 1.0±0.1            | 0.9±0.3             |
| Glucagon (pg/ml)                                                                                                                         | 69±15                      | 67±15              | 63±12               |
| Adiponectin (ng/ml)                                                                                                                      | 1.2±0.2                    | 1.1±0.2            | 1.2±0.4             |
| MBH, mediobasal hypothalamus. <sup>a</sup> Infusions: MBH/Systemic. Data are means±s.e.m.; n=6-7. Asterisk denote p<0.05 versus veh/veh. |                            |                    |                     |

SUPPLEMENTARY DATA

**Supplementary Table 3.** Metabolic parameters of animals injected with shRNA vectors in the MBH during the basal period and the pancreatic clamp studies receiving either vehicle or proline into the MBH.

|                                                                                                                                                                                  | Vehicle |         | Proline  |         |
|----------------------------------------------------------------------------------------------------------------------------------------------------------------------------------|---------|---------|----------|---------|
|                                                                                                                                                                                  | Ctrl    | LdhA    | Ctrl     | LdhA    |
| <b>Basal</b>                                                                                                                                                                     |         |         |          |         |
| Body weight (g)                                                                                                                                                                  | 327±5   | 324±6   | 330±8    | 329±9   |
| Insulin (ng/ml)                                                                                                                                                                  | 1.3±0.2 | 1.3±0.2 | 1.0±0.1* | 1.6±0.2 |
| Glucagon (pg/ml)                                                                                                                                                                 | 79±22   | 82±21   | 105±18   | 100±22  |
| <b>Clamp</b>                                                                                                                                                                     |         |         |          |         |
| Glucose (mM)                                                                                                                                                                     | 8.7±0.2 | 8.6±0.1 | 8.3±0.2  | 8.7±0.2 |
| Insulin (ng/ml)                                                                                                                                                                  | 0.9±0.1 | 0.9±0.1 | 0.9±0.2  | 1.1±0.1 |
| Glucagon (pg/ml)                                                                                                                                                                 | 43±14   | 45±7    | 67±16    | 59±16   |
| Adiponectin (ng/ml)                                                                                                                                                              | 2.5±0.4 | 2.5±0.3 | 1.9±0.3  | 2.0±0.3 |
| MBH, mediobasal hypothalamus; Ctrl, non-silencing shRNA vector; LdhA, LdhA-shRNA vector. Data are means±s.e.m.; n=5-6. Asterisk denote p<0.05 versus the appropriate LdhA value. |         |         |          |         |

**Supplementary Figure 1.** Circulating proline regulates hepatic glucose production in animals with intact brains. **A**, Schematic of pancreatic clamp procedure in rats receiving systemic infusions of either proline or vehicle. The animals did not have cannulae implanted in the mediobasal hypothalamus (MBH). **B-E**, Effect of the systemic administration of either vehicle (n=6, white bars) or proline (n=6, black bars) on glucose infusion rate (**B**), glucose production (**C, D**), and glucose utilization (**E**). Asterisk denotes p<0.05 vs vehicle. All values are mean±s.e.m.

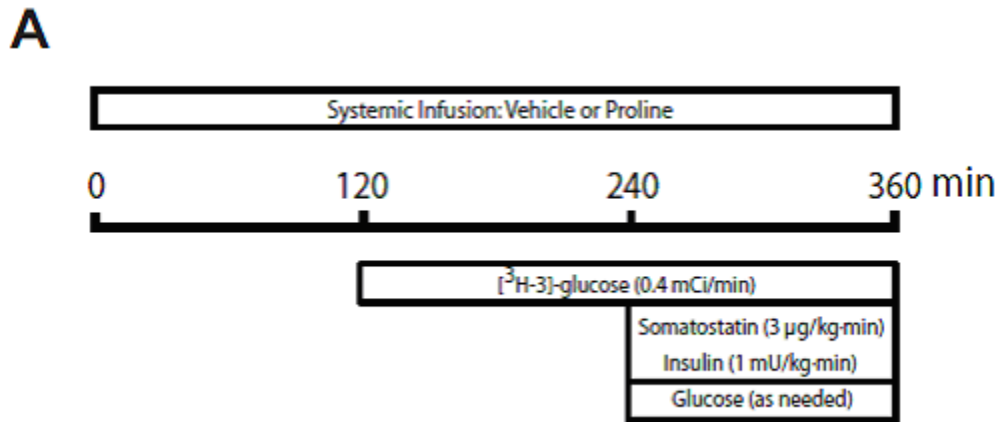

SUPPLEMENTARY DATA

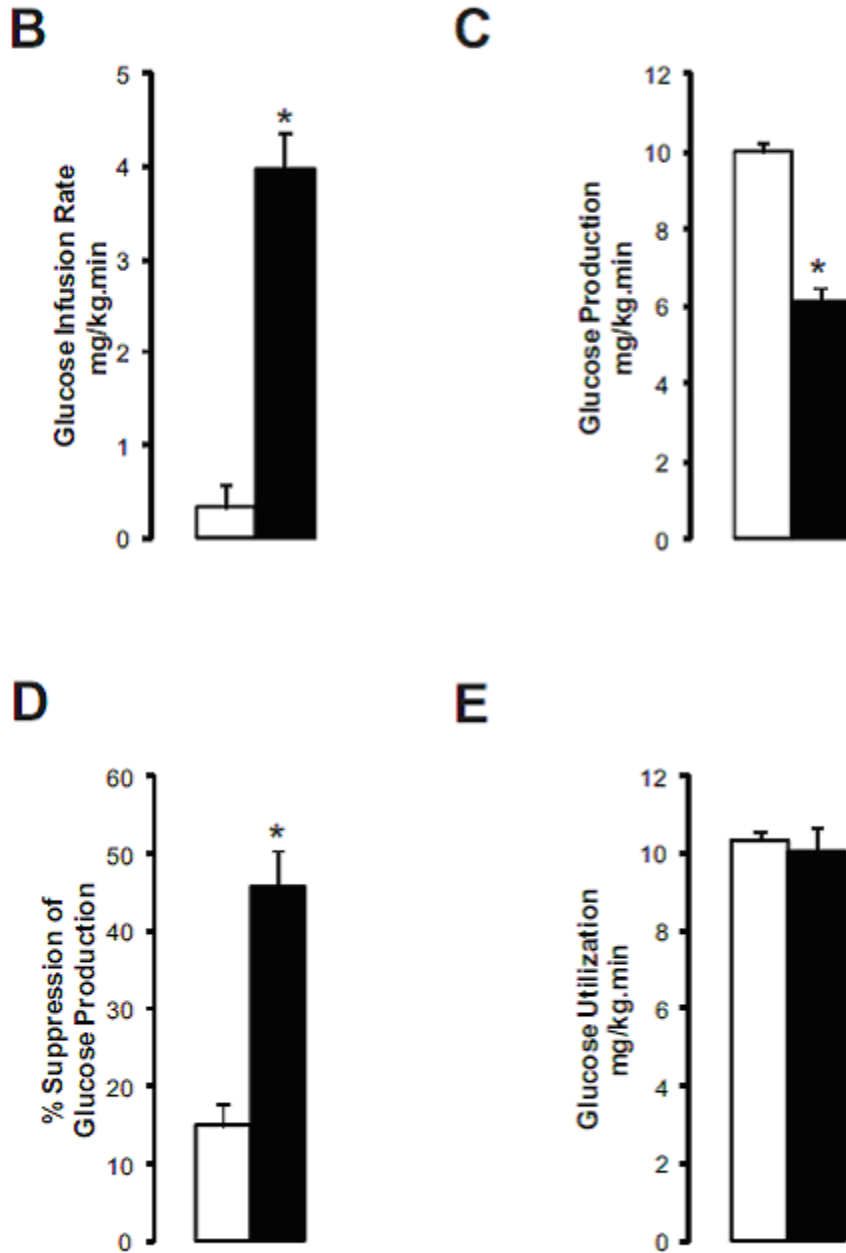

**Supplementary Figure 2.** LDH-B expression is not affected by LDH-A specific knock down. LDH isoform expression was determined by Western blot analysis of HTC cells transfected with sequence specific LDH-A silencing RNA and probed with either LDH-A or LDH-B antibodies. Ab, antibody.

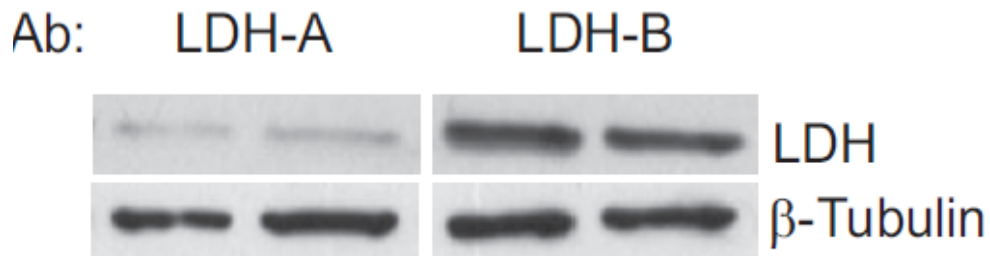

Supplement: supp_db12-0228_DB120228SupplementaryData.pdf [file supp_db12-0228_DB120228SupplementaryData.pdf]
